# Supplementary material
Source: publisher figshare collection journal article supplement (https://acs.figshare.com/ndownloader/files/5138875)
Supplement: Supplementary file 1 [file 5138875]

## Supporting Information

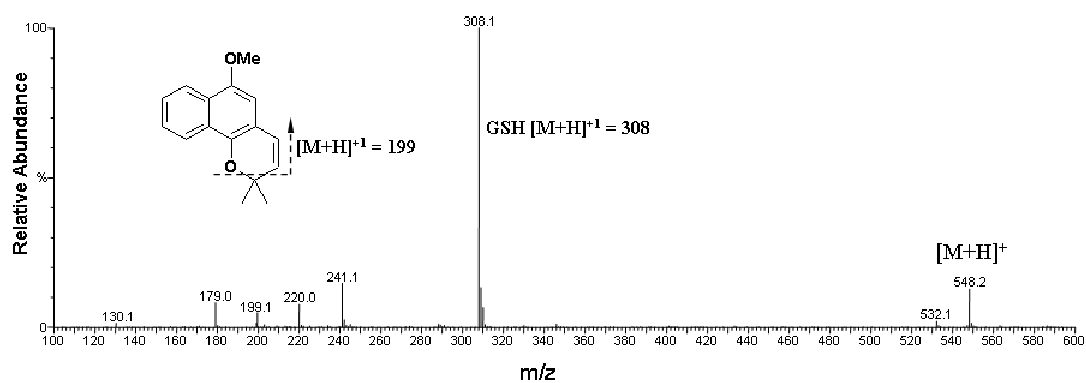

**Figure S1-** ESI-mass spectrum of the lapachenole-glutathione conjugate. The base peak at 308 amu is derived from the glutathione nucleus, while the peak at 199 amu is the lapachenole nucleus after loss of a propyl group from its dimethylated carbon center.

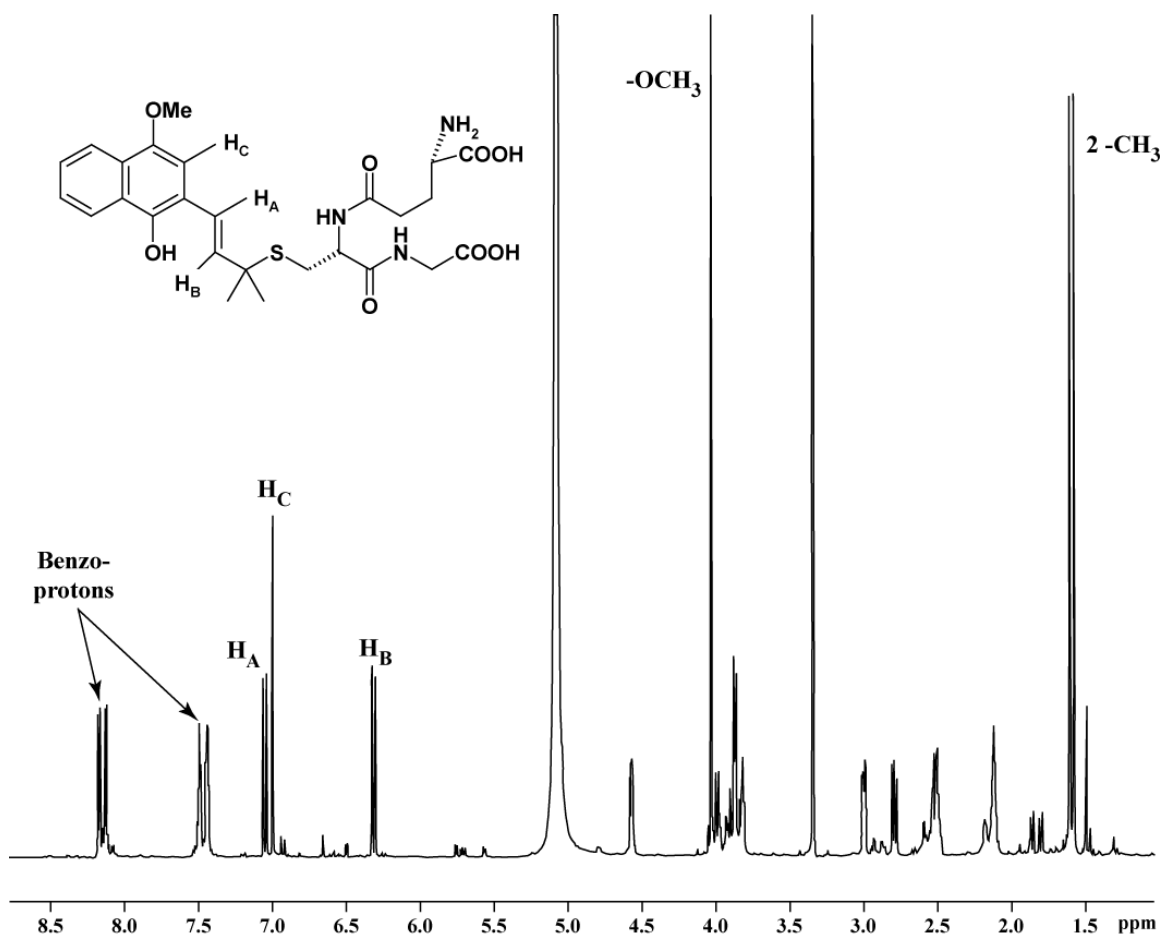

**Figure S2-**  $^1\text{H}$  NMR spectrum of the lapachenole-glutathione conjugate obtained at 750 MHz in deuterated methanol.

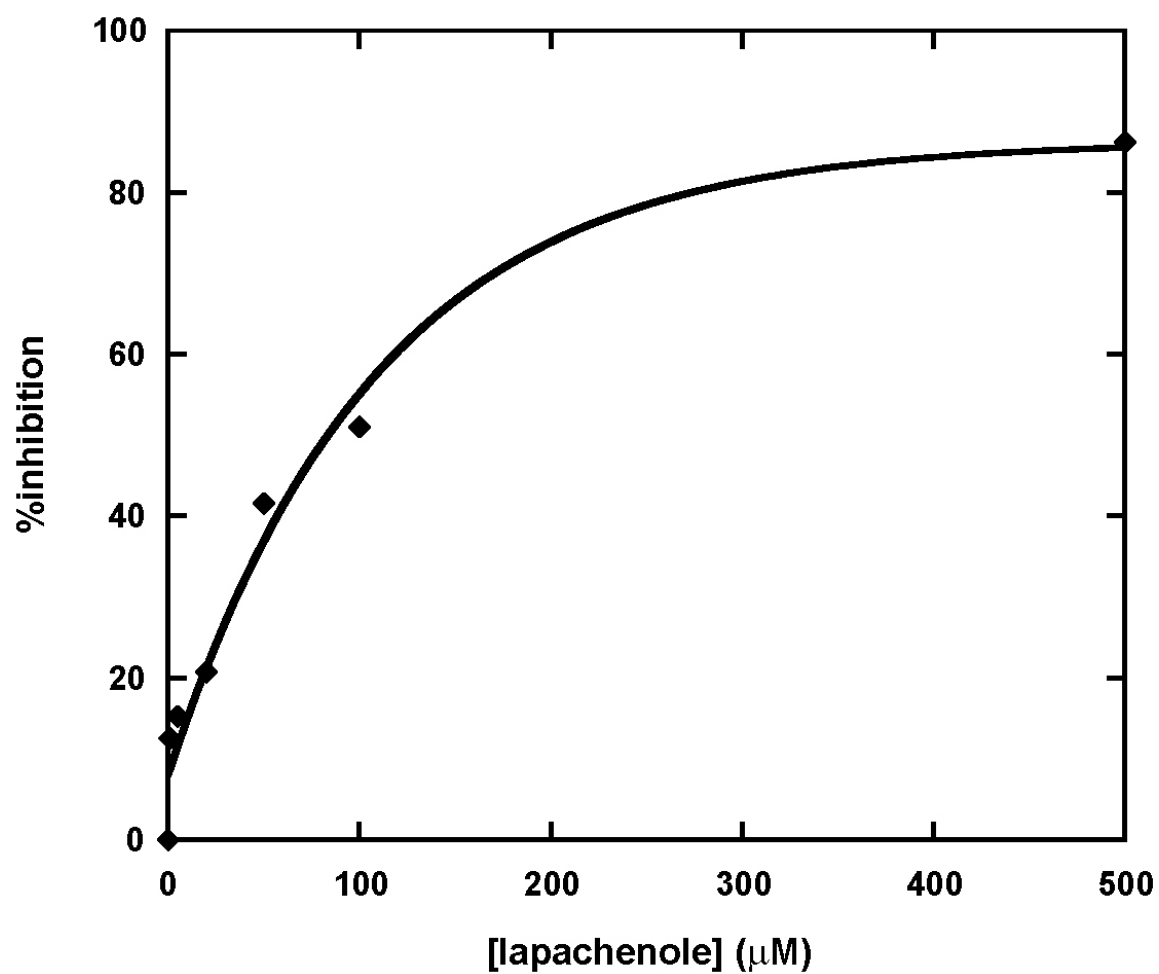

**Figure S3-** Inhibition of P450 3A4-mediated oxidation of midazolam by lapachenole.

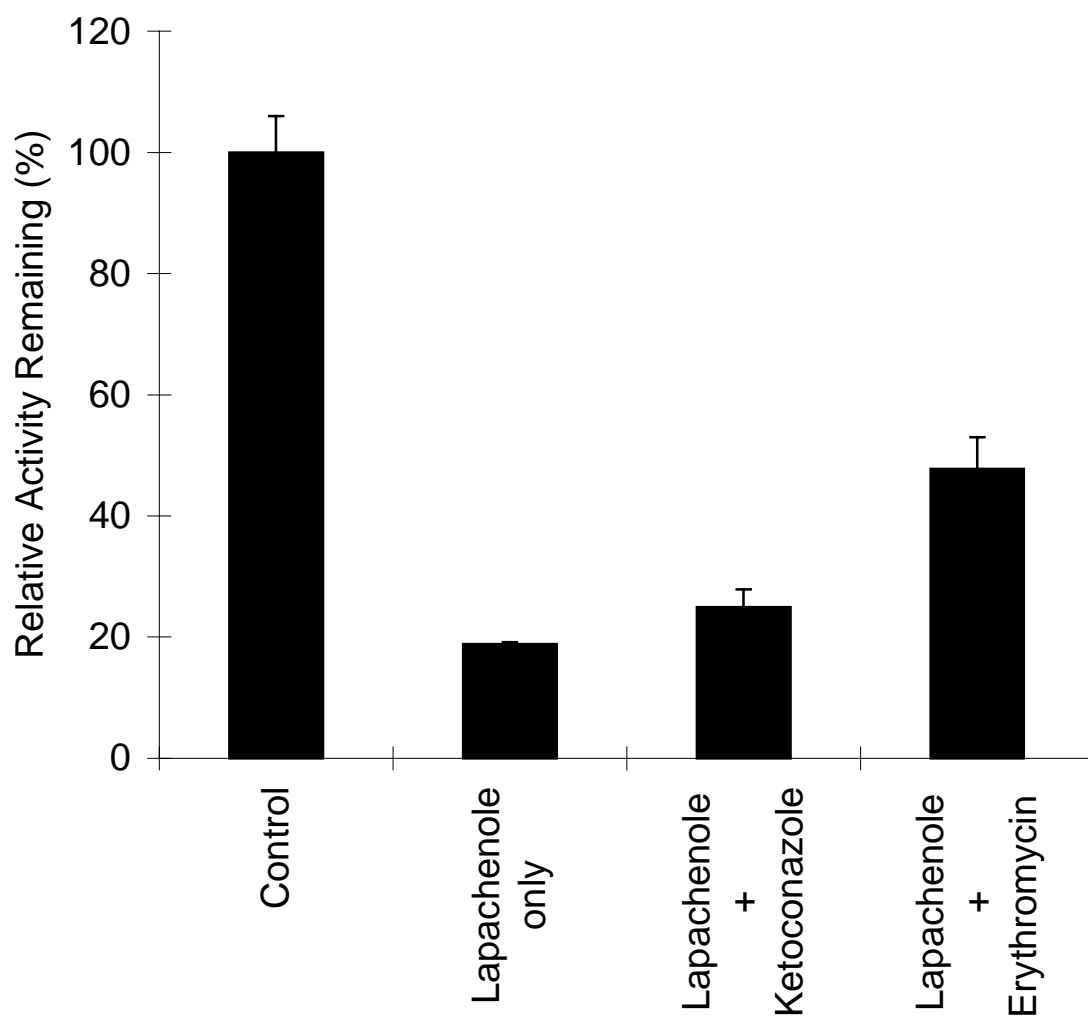

**Figure S4-** Photolabeling inhibition of CYP3A4-HT activity by lapachenole as measured by CYP3A4 midazolam 1'-hydroxylation activity. Ketoconazole-treated preparations were exposed to 50  $\mu$ M ketoconazole prior to irradiation. Erythromycin-treated samples were exposed to 60  $\mu$ M erythromycin prior to irradiation.

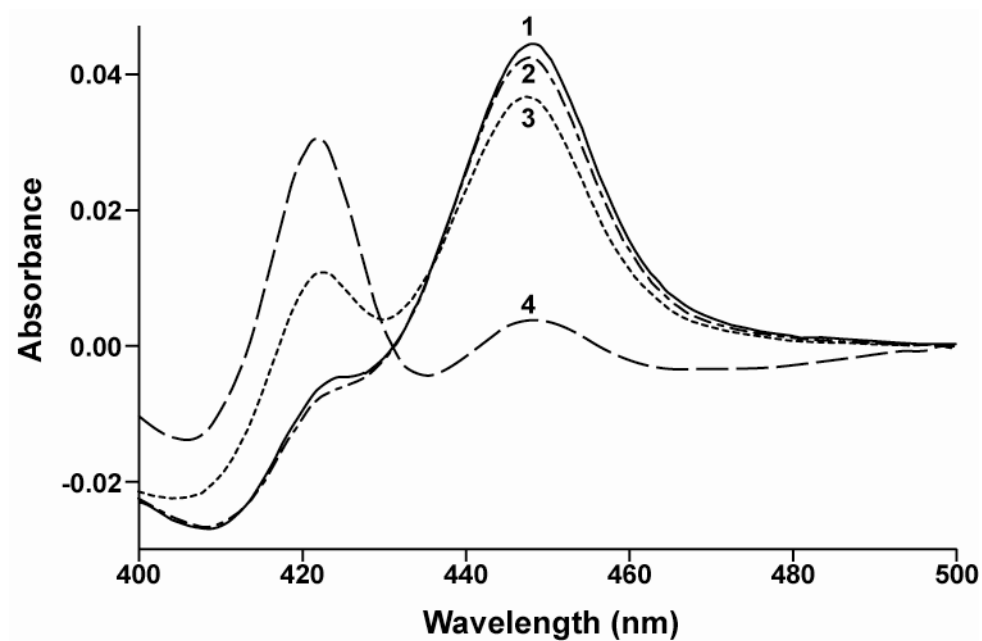

**Figure S5-** Influence of lapachenole binding to P450 3A4 on CO-reduced difference spectra. Trace 1: P450 3A4-HT. Trace 2: Enzyme preparation subjected to photolysis conditions. Trace 3: Enzyme preparation treated with 200  $\mu$ M lapachenole in the dark. Trace 4: Enzyme preparation treated with lapachenole and irradiated for one minute.
